# Supplementary material for: The Sde Phosphoribosyl-Linked Ubiquitin Transferases protect the Legionella pneumophila vacuole from degradation by the host
Source: PubMed Central journal article supplement — bioRxiv. 2023 Mar 20:2023.03.19.533379. Preprint. [Version 1] doi: 10.1101/2023.03.19.533379 (PMC10055210; doi:10.1101/2023.03.19.533379), 2023-03-20
Supplement: NIHPP2023.03.19.533379v1-supplement-1.pdf [file NIHPP2023.03.19.533379v1-supplement-1.pdf]

## **Supporting Information**

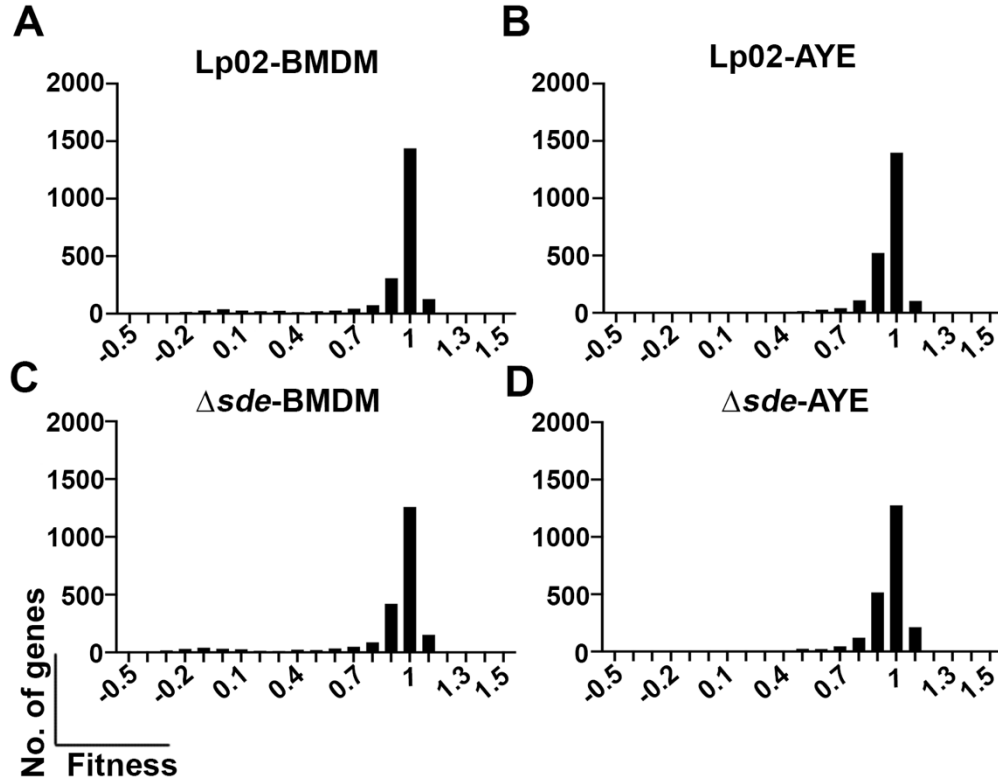

**Fig. S1 (Linked to Fig.1). Histogram plots of fitness for all *L. pneumophila* genes represented on Tn-seq.**

Histogram of WT (SK01) Tn-seq pool following either infection in BMDM (A) or growth in nutrient-rich AYE medium (B). Histogram of  $\Delta sde$  (SK02) Tn-seq pool following infection in BMDM (C) or growth in nutrient-rich AYE medium (D).

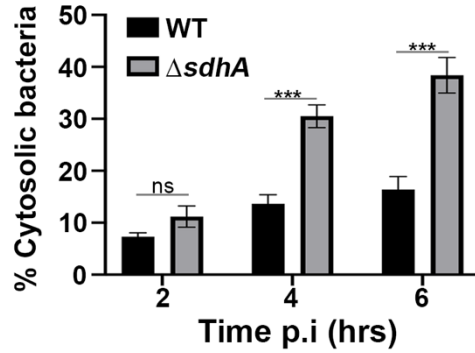

**Fig. S2 (Linked to Fig.3). The integrity of LCVs harboring  $\Delta sdhA$  strains after challenge with *L. pneumophila*.**

Percent cytosolic bacteria was quantified based on antibody accessibility. BMDMs were infected with either WT or  $\Delta sdhA$  strains for 2, 4, and 6 hr, fixed, and stained with antibodies. The internalized bacteria in the absence of permeabilization were calculated relative to the total infected population (mean  $\pm$  SEM; three biological replicates were performed and 100 LCVs were counted per biological replicate). Statistical analysis was conducted using unpaired two-tailed Student's t test (ns, not significant; \*\*\* $p < 0.001$ ).

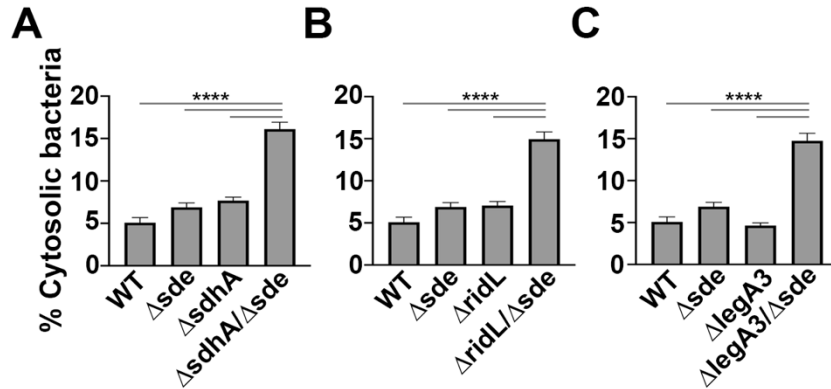

**Fig. S3 (Linked to Fig. 3). The loss of *sdhA*, *ridL* and *legA3* aggravated vacuole disruption in  $\Delta sde$  strain.**

Vacuole integrity was measured based on antibody accessibility. BMDMs in a 96 well plate were infected with the indicated strains for 2 hr, fixed and stained with antibodies. The images were taken by Lionheart automatic microscope using 10X magnification objective. The internalized bacteria in the absence of permeabilization were calculated relative to total infected population to determine fraction of disrupted vacuoles (mean  $\pm$  SEM; three biological replicates were performed and 1000-3000 LCVs were counted per biological replicate). Statistical significance was tested using one-way ANOVA with Tukey's multiple comparisons; \*\*\*\*p <0.001.

**Table S1. Strains, Plasmids and Oligonucleotides used in this study**

| Strains               | Genotype                                                                                                                                              | Description                                               | Reference |
|-----------------------|-------------------------------------------------------------------------------------------------------------------------------------------------------|-----------------------------------------------------------|-----------|
| <i>L.pneumophila</i>  |                                                                                                                                                       |                                                           |           |
| Lp02                  | Philadelphia 1 <i>thyA<sup>-</sup> rpsL hsdR</i>                                                                                                      | Wild type strain                                          | (1)       |
| SK01                  | Lp02 <i>thyA<sup>+</sup></i>                                                                                                                          | Wild type strain <i>thyA<sup>+</sup></i>                  | This work |
| Lp03                  | <i>thyA<sup>+</sup> rpsL hsdR dotA03</i>                                                                                                              | Icm/Dot translocation deficient                           | (1)       |
| JV6113                | Lp02 $\Delta$ <i>sidE</i> $\Delta$ <i>sdeC</i> $\Delta$ <i>sdeBA</i> ( $\Delta$ <i>lpg0234</i> $\Delta$ <i>lpg2153</i> $\Delta$ <i>lpg2156-2157</i> ) | <i>sidE</i> family deletion mutant                        | (2)       |
| SK02                  | JV6113 <i>thyA<sup>+</sup></i>                                                                                                                        | JV6113 strain <i>thyA<sup>+</sup></i>                     | This work |
| SK03                  | Lp02 <i>thyA<sup>+</sup> <math>\Delta</math>sdhA</i>                                                                                                  | <i>sdhA</i> deletion mutant                               | This work |
| SK04                  | JV6113 <i>thyA<sup>+</sup> <math>\Delta</math>sdhA</i>                                                                                                | <i>sdhAsidE</i> family deletion mutant                    | This work |
| SK05                  | Lp02 <i>thyA<sup>+</sup> <math>\Delta</math>ridL</i>                                                                                                  | <i>ridL</i> deletion mutant                               | This work |
| SK06                  | JV6113 <i>thyA<sup>+</sup> <math>\Delta</math>ridL</i>                                                                                                | <i>ridLsidE</i> family deletion mutant                    | This work |
| SK07                  | Lp02 <i>thyA<sup>+</sup> <math>\Delta</math>legA3</i>                                                                                                 | <i>legA3</i> deletion mutant                              | This work |
| SK08                  | JV6113 <i>thyA<sup>+</sup> <math>\Delta</math>legA3</i>                                                                                               | <i>legA3sidE</i> family deletion mutant                   | This work |
| SK09                  | Lp02 <i>thyA<sup>+</sup> <math>\Delta</math>sdhA <math>\Delta</math>ridL</i>                                                                          | <i>sdhAridL</i> deletion mutant                           | This work |
| SK10                  | Lp02 <i>thyA<sup>+</sup> <math>\Delta</math>sdhA <math>\Delta</math>legA3</i>                                                                         | <i>sdhA legA3</i> deletion mutant                         | This work |
| SK11                  | Lp02 <i>thyA<sup>+</sup> <math>\Delta</math>ridL <math>\Delta</math>legA3</i>                                                                         | <i>ridL legA3</i> deletion mutant                         | This work |
| SK12                  | Lp02 <i>thyA<sup>+</sup> kan<sup>R</sup> P<sub>ahpc</sub>::lux</i>                                                                                    | wild type strain Lux <sup>+</sup>                         | This work |
| SK13                  | JV6113 <i>thyA<sup>+</sup> kan<sup>R</sup> P<sub>ahpc</sub>::lux</i>                                                                                  | <i>sidE</i> family deletion mutant Lux <sup>+</sup>       | This work |
| SK14                  | SK02 <i>kan<sup>R</sup> P<sub>ahpc</sub>::lux</i>                                                                                                     | <i>sdhA</i> deletion mutant Lux <sup>+</sup>              | This work |
| SK15                  | SK03 <i>kan<sup>R</sup> P<sub>ahpc</sub>::lux</i>                                                                                                     | <i>sdhAsidE</i> family deletion mutant Lux <sup>+</sup>   | This work |
| SK16                  | SK04 <i>kan<sup>R</sup> P<sub>ahpc</sub>::lux</i>                                                                                                     | <i>ridL</i> deletion mutant Lux <sup>+</sup>              | This work |
| SK17                  | SK05 <i>kan<sup>R</sup> P<sub>ahpc</sub>::lux</i>                                                                                                     | <i>ridLsidE</i> family deletion mutant                    | This work |
| SK18                  | SK06 <i>kan<sup>R</sup> P<sub>ahpc</sub>::lux</i>                                                                                                     | <i>legA3</i> deletion mutant Lux <sup>+</sup>             | This work |
| SK19                  | SK07 <i>kan<sup>R</sup> P<sub>ahpc</sub>::lux</i>                                                                                                     | <i>legA3 sidE</i> family deletion mutant Lux <sup>+</sup> | This work |
| Lp03 lux <sup>+</sup> | Lp03 <i>kan<sup>R</sup> P<sub>ahpc</sub>::lux</i>                                                                                                     | Icm/Dot translocation deficient Lux <sup>+</sup>          | (3)       |
| JV4487                | $\Delta$ <i>sidJ</i>                                                                                                                                  | <i>sidJ</i> deletion mutant                               | (2)       |
| SK20                  | Lp02 $\Delta$ <i>sdhA</i>                                                                                                                             | <i>sdhA</i> deletion mutant                               | This work |
| SK21                  | Lp02 $\Delta$ <i>sdhA</i> $\Delta$ <i>sidJ</i>                                                                                                        | <i>sdhAsidJ</i> deletion mutant                           | This work |
| SK22                  | SK01+ pMMB207 $\Delta$ 267                                                                                                                            |                                                           | This work |
| SK23                  | SK02+ pMMB207 $\Delta$ 267                                                                                                                            |                                                           | This work |
| SK24                  | SK03+ pMMB207 $\Delta$ 267                                                                                                                            |                                                           | This work |
| SK25                  | SK04+ pMMB207 $\Delta$ 267                                                                                                                            |                                                           | This work |

## Plasmids

| Name                                 | Features                                                                                                                     | Description                                         | Reference            |
|--------------------------------------|------------------------------------------------------------------------------------------------------------------------------|-----------------------------------------------------|----------------------|
| pTO100MmeI                           | R6Kori <i>kan<sup>R</sup></i> , <i>sacB</i> , <i>ampR</i> , <i>himarI</i> -MmeI, C9 transposase                              | Tn-seq transposon mutagenesis plasmid               | (5)                  |
| pSR47S                               | R6Kori <i>sacB</i> , <i>kan<sup>R</sup></i>                                                                                  | suicide vector                                      | (6)                  |
| pSR47S- <i>P<sub>ahpc</sub>::lux</i> | R6Kori <i>sacB</i> , <i>kan<sup>R</sup></i> <i>P<sub>ahpc</sub>::lux</i>                                                     | pSR47 containing <i>P. luminescens</i> lux operon   | (7)                  |
| pJB3395                              | pBluescript:: <i>thyA<sup>+</sup> amp<sup>R</sup></i>                                                                        | <i>thyA</i> allelic exchange vector                 | J. Vogel             |
| pTO243                               | pbluescript:: PolyHis- <i>attR1</i> -[ <i>Kan<sup>R</sup></i> - <i>Kan<sup>R</sup></i> - <i>ccdB</i> ]- <i>attR2</i>         |                                                     | O'Connor<br>Tamara   |
| pSK01                                | pSR47S:: $\Delta$ <i>sdhA</i>                                                                                                | <i>sdhA</i> deletion plasmid                        |                      |
| pSK02                                | pSR47S:: $\Delta$ <i>ridL</i>                                                                                                | <i>ridL</i> deletion plasmid                        |                      |
| pMMB207                              | <i>OriR</i> (RSF1010), Cm <sup>R</sup>                                                                                       |                                                     | (8)                  |
| pMMB207 $\Delta$ 267                 | <i>OriR</i> (RSF1010), Cm <sup>R</sup> , $\Delta$ 267                                                                        | pMMB207 lacking 267 bps of N- terminal <i>mobA</i>  | Elizabeth<br>Creasey |
| pSK03                                | pMMB207 $\Delta$ 267::PolyHis- <i>attR1</i> -[ <i>Kan<sup>R</sup></i> - <i>Kan<sup>R</sup></i> - <i>ccdB</i> ]- <i>attR2</i> | Gateway destination version of pMMB207 $\Delta$ 267 | This work            |
| pSK04                                | pMMB207 $\Delta$ 267::PolyHis- <i>attB1</i> - <i>sdeA</i> - <i>attB2</i>                                                     | <i>sdeA</i> complementation plasmid                 | This work            |
| pSK05                                | pMMB207 $\Delta$ 267::PolyHis- <i>attB1</i> - <i>sdeB</i> - <i>attB2</i>                                                     | <i>sdeB</i> complementation plasmid                 | This work            |
| pSK06                                | pMMB207 $\Delta$ 267::PolyHis- <i>attB1</i> - <i>sdeC</i> - <i>attB2</i>                                                     | <i>sdeC</i> complementation plasmid                 | This work            |
| pTO198                               | pSR47S:: $\Delta$ <i>legA3</i>                                                                                               | <i>legA3</i> deletion plasmid                       | (9)                  |

## *E. coli*

|                            |                                                                                                                                                           |  |      |
|----------------------------|-----------------------------------------------------------------------------------------------------------------------------------------------------------|--|------|
| DH5 $\alpha$               | <i>supE44</i> $\Delta$ <i>lacU169</i> ( $\Phi$ 80 <i>lacZ</i> DM15)<br><i>hsdR17</i> <i>recA1</i> <i>endA1</i> <i>gyrA96</i><br><i>thi-1</i> <i>relA1</i> |  |      |
| DH5 $\alpha$ $\lambda$ pir | DH5 $\alpha$ ( $\lambda$ pir) <i>tet</i> ::Mu <i>recA</i>                                                                                                 |  | (12) |
| BL21 DE3                   | F <sup>+</sup> <i>ompT</i> <i>hsdSB</i> <i>dcm</i> (DE3)                                                                                                  |  |      |

## Oligonucleotides

| Name                               | Sequences (5' to 3')                          |
|------------------------------------|-----------------------------------------------|
| <i>Construction of sdhA mutant</i> |                                               |
| SK1                                | GGCGCTAATTGCTGAAATCATTTC AATATTA AAAAAAATTAAC |
| SK2                                | CCGGGGGATGAACAATTTACCCCTG                     |
| SK3                                | GATTCAGCAATTAGCGCCATCCGCATAAAAATATTTG         |
| SK4                                | GAAGTAGGGCGTAGGCGTTGACCATTA AAAAG             |
| pSR47s_ <i>sdhA</i> _F             | TTGTTCATCCCCGGGCTGCAGGAAT                     |
| pSR47s_ <i>sdhA</i> _R             | CCTACGCCCTAGTTCTAGAGCGGCCGCC                  |

## *Construction of ridL mutant*

|     |                                       |
|-----|---------------------------------------|
| SK5 | TCATTATTATTATGTGTTTCATTTTAAGCCAAAAAAC |
|-----|---------------------------------------|

SK6 AGCCCGGGGGTTATTACTGAAGTCGTGAC  
 SK7 CTAGAACTAGGATACTGGTGGATTGTCG  
 SK8 TGAACACATAATAATAATGACTTTGGCTCTC  
 pSR47s\_ridL\_F CAGTAATAACCCCCGGGCTGCAGGAAT  
 pSR47s\_ridL\_R CACCAGTATCCTAGTTCTAGAGCGGCCGCC

*Confirmation of recombinant plasmid*

pSR47s\_conF GGGAAACAAAAGCTGGAGC  
 pSR47s\_conR GTGAACGGCAGGTATATGT

*qRT-PCR*

| Name    | Sequences (5' to 3')     |
|---------|--------------------------|
| rRNA_F  | AGAGATGCATTAGTGCCTTCGGGA |
| rRNA_R  | ACTAAGGATAAGGGTTGCGCTCGT |
| ridL_F  | GTCCTCTGAAGGATAGCGAAAC   |
| ridL_R  | GTGTAAGTTCCCGCAACAAATC   |
| sidE_F  | GCCTAAGTACGTTGAAGGGATAG  |
| sidE_R  | GCCTGTCAAGAGCACCTTTA     |
| sdeC_F  | AAATCAGGAGAAGCGGTTAGG    |
| sdeC_R  | CGTGAGAGCCGGGATAATTT     |
| sdeB_F  | CCAGGCTTCACTCACTTGATAA   |
| sdeB_R  | CCTCTCGATACCTACTGTGTCT   |
| sdeA_F  | CCCCTGCACCACAAGATAA      |
| sdeA_R  | GGTATACGGTTTGCCAGATAG    |
| sdhA_F  | GGAAGGCAGGATTCTCCATTTA   |
| sdhA_R  | AGCTCTGAGTTCAGGAGGTAT    |
| legA3_F | CTCCGCTCTTTCCAGATGAC     |
| legA3_R | GAGTGGGTCGAGTGGGATAA     |
| sidJ_F  | GTTGTTCTACCCAACCTGG      |
| sidJ_R  | CAGAGAGGTGTCATGAGTGC     |

*Mariner Tn-seq sequencing library construction*

| Name             | Sequences (5' to 3')                | Index |
|------------------|-------------------------------------|-------|
| <i>First PCR</i> |                                     |       |
| Nextera 2A-R     | GTCTCGTGGGCTCGGAGATGTGTATAAAGAGACAG |       |
| 1st_TnR          | GTAATACGACTCACTATAGGGTCTAGAG        |       |

*Second PCR- Leftward Mariner specific Nextera Indexed primers*

|        |                                                                            |           |
|--------|----------------------------------------------------------------------------|-----------|
| mar147 | AATGATACGGCGACCACCGAGATCTACACGCAGGCCGGC<br>GTTGACCGGGGACTTATCAGCCAACCTGTTA | GCAGGCCGG |
| mar148 | AATGATACGGCGACCACCGAGATCTACACAGGCAGAAC<br>GTTGACCGGGGACTTATCAGCCAACCTGTTA  | AGGCAGAA  |
| mar149 | AATGATACGGCGACCACCGAGATCTACACCAGAGAGGC<br>GTTGACCGGGGACTTATCAGCCAACCTGTTA  | CAGAGAGG  |
| mar150 | AATGATACGGCGACCACCGAGATCTACACCAGGCTGC                                      | CGAGGCTG  |

|        |                                                                           |          |
|--------|---------------------------------------------------------------------------|----------|
| mar151 | GTTGACCGGGGACTTATCAGCCAACCTGTTA<br>AATGATACGGCGACCACCGAGATCTACACAAGAGGCAC | AAGAGGCA |
| mar152 | GTTGACCGGGGACTTATCAGCCAACCTGTTA<br>AATGATACGGCGACCACCGAGATCTACACGAGGAGCCC | GAGGAGCC |

*Second PCR- Rightward Mariner specific Nextera Indexed primers*

|            |                                                             |          |
|------------|-------------------------------------------------------------|----------|
| olk141     | CAAGCAGAAGACGGCATAACGAGATCCGCCTGCGTCTCGT<br>GGGCTCGGAGATGTG | GCAGGCGG |
| N703 index | CAAGCAGAAGACGGCATAACGAGATTTCTGCCTGTCTCGT<br>GGGCTCGGAGATGTG | AGGCAGAA |

*Reconditioning*

|    |                        |
|----|------------------------|
| P1 | AATGATACGGCGACCACCGA   |
| P2 | CAAGCAGAAGACGGCATAACGA |

*Sequencing*

|        |                                  |
|--------|----------------------------------|
| mar512 | CGTTGACCGGGGACTTATCAGCCAACCTGTTA |
|--------|----------------------------------|

---



## SI References

1. K. H. Berger, R. R. Isberg, Two distinct defects in intracellular growth complemented by a single genetic locus in *Legionella pneumophila*. *Mol Microbiol* **7**, 7-19 (1993).
2. K. C. Jeong, J. A. Sexton, J. P. Vogel, Spatiotemporal regulation of a *Legionella pneumophila* T4SS substrate by the metaeffector SidJ. *PLoS Pathog* **11**, e1004695 (2015).
3. A. W. Ensminger, Y. Yassin, A. Miron, R. R. Isberg, Experimental evolution of *Legionella pneumophila* in mouse macrophages leads to strains with altered determinants of environmental survival. *PLoS Pathog* **8**, e1002731 (2012).
4. N. A. Ellis, B. Kim, J. Tung, M. P. Machner, A multiplex CRISPR interference tool for virulence gene interrogation in *Legionella pneumophila*. *Commun Biol* **4**, 157 (2021).
5. J. M. Park, S. Ghosh, T. J. O'Connor, Combinatorial selection in amoebal hosts drives the evolution of the human pathogen *Legionella pneumophila*. *Nat Microbiol* **5**, 599-609 (2020).
6. J. J. Merriam, R. Mathur, R. Maxfield-Boumil, R. R. Isberg, Analysis of the *Legionella pneumophila* *fliI* gene: intracellular growth of a defined mutant defective for flagellum biosynthesis. *Infect Immun* **65**, 2497-2501 (1997).
7. J. Coers, R. E. Vance, M. F. Fontana, W. F. Dietrich, Restriction of *Legionella pneumophila* growth in macrophages requires the concerted action of cytokine and Naip5/Ipaf signalling pathways. *Cell Microbiol* **9**, 2344-2357 (2007).
8. V. M. Morales, A. Backman, M. Bagdasarian, A series of wide-host-range low-copy-number vectors that allow direct screening for recombinants. *Gene* **97**, 39-47 (1991).
9. T. J. O'Connor, D. Boyd, M. S. Dorer, R. R. Isberg, Aggravating genetic interactions allow a solution to redundancy in a bacterial pathogen. *Science* **338**, 1440-1444 (2012).
10. M. Wan *et al.*, Deubiquitination of phosphoribosyl-ubiquitin conjugates by phosphodiesterase-domain-containing *Legionella* effectors. *Proc Natl Acad Sci U S A* **116**, 23518-23526 (2019).
11. Y. H. Lin *et al.*, Host Cell-catalyzed S-Palmitoylation Mediates Golgi Targeting of the *Legionella* Ubiquitin Ligase GobX. *J Biol Chem* **290**, 25766-25781 (2015).
12. R. Kolter, M. Inuzuka, D. R. Helinski, Trans-complementation-dependent replication of a low molecular weight origin fragment from plasmid R6K. *Cell* **15**, 1199-1208 (1978).
